# Supplementary material for: Mechanisms of (photo)toxicity of TiO2nanomaterials (NM103, NM104, NM105): using high-throughput gene expression inEnchytraeus crypticus
Source: Royal Society of Chemistry journal article supplement (doi:10.1039/c8nr03251c), 2018-01-01
Supplement: c8nr03251c2.pdf [file c8nr03251c2.pdf]

## Supporting Information

Figure S1 and Table S4

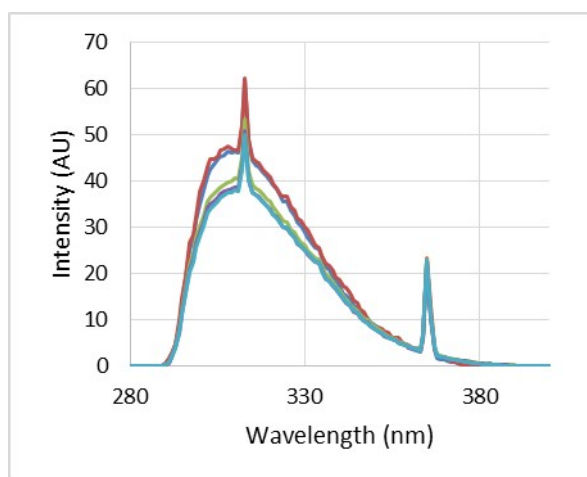

**Figure S1.** Emission spectra of the lamp used to provide UVB radiation (Spectroline XX15F/B lamp, peak at 312 nm). The different colours correspond to the measurements performed in the different days.

**Table S4.** Summary of main biological processes/pathways and respective transcripts affected by the several TiO<sub>2</sub> materials. ↑: up-regulated; ↓: down-regulated.

| TiO <sub>2</sub> | <i>PROCESS / PATHWAY: Transcripts</i> |                              |
|------------------|---------------------------------------|------------------------------|
|                  | No-UV                                 | UV                           |
| all              | <i>CELL ADHESION MOLECULES - CAMs</i> |                              |
|                  | ↑GlgI; ↑NCAM                          | ↑fascilin ii                 |
| TiO <sub>2</sub> | <i>NEUROTRANSMISSION</i>              |                              |
|                  | <i>DOPAMINERGIC SYNAPSE</i>           | <i>GLUTAMATERGIC SYNAPSE</i> |

|                             |                                                                               |                                                                                                             |
|-----------------------------|-------------------------------------------------------------------------------|-------------------------------------------------------------------------------------------------------------|
|                             | ↑kinesin heavy chain                                                          | ↑iGlu subunit                                                                                               |
|                             | <b>CELLULAR RESPONSE TO ROS</b><br>↓PRDX5                                     | <b>pancreatic secretion, protein digestion &amp; absorption</b><br>↑serine proteinase; ↑fibrinolytic enzyme |
|                             | <b>HISTONE H4 ACETYLATION</b><br>↓SCP                                         | <b>PROTEOLYSIS</b><br>↑serine proteinase; ↑ela1; ↑Casp4; ↑fibrinolytic enz.                                 |
|                             | -                                                                             | <b>LYSOSOME</b> : ↑Ctsb                                                                                     |
| <b>Bulk TiO<sub>2</sub></b> | <b>DNA DAMAGE (nucleotide excision repair)</b><br>↑Ercc4                      | -                                                                                                           |
|                             | <b>ENERGY METABOLISM</b>                                                      |                                                                                                             |
|                             | ↓ G6PI; ↓PGM; ↓PGD; ↓ACO2                                                     | ↑GMDS; ↑LPH; ↑GAPDH; ↑PEPCK                                                                                 |
|                             | <b>NUCLEOTIDE METABOLISM</b><br>↓TXNRD2; ↓DPD; ↓RRM1                          | <b>RESPONSE TO OXIDATIVE STRESS</b><br>↑PRDX 6; ↑PHGPx; ↑NDUFS2                                             |
| <b>NM 103</b>               | <b>DNA REPAIR</b><br>↓exonuclease 1; ↓RPS27L; ↓Psm4; ↓UBE2N                   | <b>Ca SIGNALING</b><br>↑ Ca-transporting ATPases                                                            |
|                             | <b>APOPTOTIC SIGNALLING PATHWAY</b><br>↓HTRA2; ↓RPS27L; ↓cullin 2; ↓MBD4      | -                                                                                                           |
|                             | <b>TRANSCRIPTION and TRANSLATION</b><br>↑Maf1 homolog; ↓DDX39; ↓U2AF1; ↓PSMG2 | -                                                                                                           |
|                             | <b>ENERGY METABOLISM</b>                                                      |                                                                                                             |
|                             | ↓ G6PI; ↓PGM; ↓PGD; ↓ACO2                                                     | ↑GMDS; ↑LPH; ↑GAPDH; ↑PEPCK                                                                                 |
|                             | <b>NUCLEOTIDE METABOLISM</b><br>↓TXNRD2; ↓DPD; ↓RRM1                          | <b>RESPONSE TO OXIDATIVE STRESS</b><br>↑PRDX 6; ↑PHGPx; ↑NDUFS2                                             |
| <b>NM 104</b>               | <b>DNA REPAIR</b><br>↓exonuclease 1; ↓RPS27L; ↓Psm4; ↓UBE2N                   | <b>Ca SIGNALING</b><br>↑ Ca-transporting ATPases                                                            |
|                             | <b>APOPTOTIC SIGNALLING PATHWAY</b><br>↓HTRA2; ↓RPS27L; ↓cullin 2; ↓MBD4      | <b>DNA DAMAGE CHECKPOINT</b><br>↓CHEK1; ↓RFWD3                                                              |
|                             | <b>SENSORY PERCEPTION</b> ↑cadherin 23;                                       | <b>REPRODUCTION:</b> ↓IGF2BP; ↓HMG-CoA                                                                      |

|               |                                                                          |                                                                 |
|---------------|--------------------------------------------------------------------------|-----------------------------------------------------------------|
|               | ↑myosin vii                                                              | reductase; ↓CHEK1; ↓serine threonine kinase                     |
|               | <b>ENERGY METABOLISM</b>                                                 |                                                                 |
|               | ↓ G6PI; ↓PGM; ↓PGD; ↓ACO2                                                | ↑GMDS; ↑LPH; ↑GAPDH; ↑PEPCK                                     |
|               | <b>NUCLEOTIDE METABOLISM</b><br>↓TXNRD2; ↓DPD; ↓RRM1                     | <b>RESPONSE TO OXIDATIVE STRESS</b><br>↑PRDX 6; ↑PHGPx; ↑NDUFS2 |
|               | <b>DNA REPAIR</b><br>↓exonuclease 1; ↓RPS27L; ↓Psm4; ↓UBE2N              | <b>Ca SIGNALING</b><br>↑ Ca-transporting ATPases                |
| <b>NM 105</b> | <b>APOPTOTIC SIGNALLING PATHWAY</b><br>↓HTRA2; ↓RPS27L; ↓cullin 2; ↓MBD4 | <b>SUPEROXIDE ANION GENERATION</b><br>↑SOD; ↑CYBB               |
|               | <b>DEVELOPMENTAL PROCESSES</b><br>↓lysozyme; ↓PRMT1; ↓histone; ↓E2       | -                                                               |
|               | <b>Ca SIGNALING</b><br>↓ Ca transporting ATPases                         | -                                                               |
|               | <b>GYCEROLIPID METABOLISM</b><br>↑glycerol kinase; ↑GPAT3; ↑AGPAT9       | -                                                               |
